# Supplementary material for: AZGP1 in POMC neurons modulates energy homeostasis and metabolism through leptin-mediated STAT3 phosphorylation
Source: Springer Nature journal article supplement (doi:10.1038/s41467-024-47684-9), 2024-04-20
Supplement: MOESM1 [file 41467_2024_47684_MOESM1_ESM.pdf]

# **AZGP1 in POMC neuron modulates energy homeostasis and metabolism through leptin-mediated STAT3 phosphorylation**

## **Authors**

Sheng Qiu<sup>1,2#</sup>, Qinan Wu<sup>3,#</sup>, Hao Wang<sup>1,#</sup>, Dongfang Liu<sup>1</sup>, Chen Chen<sup>4</sup>, Zhiming Zhu<sup>5</sup>, Hongting Zheng<sup>6</sup>, Gangyi Yang<sup>1\*</sup>, Ling Li<sup>1,2\*</sup>, Mengliu Yang<sup>1\*</sup>

## **Affiliations**

<sup>1</sup>Department of Endocrinology, the Second Affiliated Hospital, Chongqing Medical University, Chongqing, 400010, China

<sup>2</sup>Department of Clinical Biochemistry and the Key Laboratory of Laboratory Medical Diagnostics in the Ministry of Education, Chongqing Medical University, Chongqing, 400016, China

<sup>3</sup>Department of Endocrinology, The affiliated Dazu hospital of Chongqing Medical university, Chongqing, 402360, China

<sup>4</sup>Endocrinology, SBMS, Faculty of Medicine, University of Queensland, Brisbane, 4072, Australia

<sup>5</sup>Department of Hypertension and Endocrinology, Daping Hospital, Third Military Medical University, Chongqing, 400042, China

<sup>6</sup>Department of Endocrinology, Xinqiao Hospital, Third Military Medical University, Chongqing, 400037, China

<sup>#</sup>These authors contributed equally to this work.

Correspondence: gangyiyang@hospital.cqmu.edu.cn (Gangyi Yang); [liling@cqmu.edu.cn](mailto:liling@cqmu.edu.cn) (Ling Li); [mengliu.yang@cqmu.edu.cn](mailto:mengliu.yang@cqmu.edu.cn) (Mengliu Yang).

## Supplementary Figures and Figure Legends

### Supplementary Fig. 1

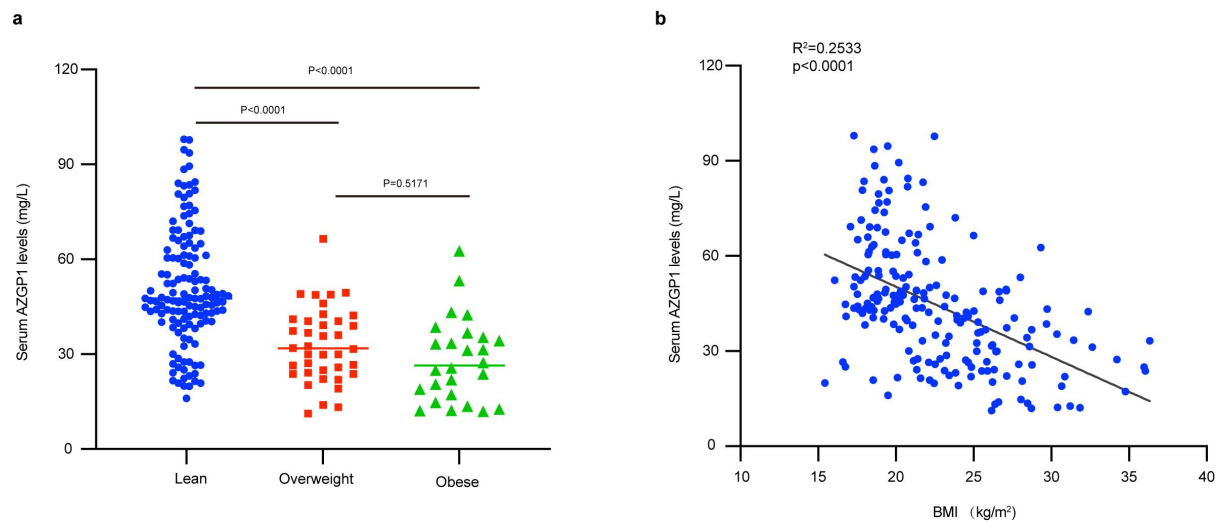

**Supplementary Fig. 1 Serum AZGP1 levels are elevated in obese individuals and are associated with BMI.** **a** Serum AZGP1 levels in lean individuals (BMI 18.5-23.9 kg/m<sup>2</sup>, n = 135 independent individuals), overweight individuals (BMI 24-27.9 kg/m<sup>2</sup>, n = 38 independent individuals) and obese individuals (BMI  $\geq 28$  kg/m<sup>2</sup>, n = 26 independent individuals). **b** Correlation between AZGP1 levels and BMI. BMI, body mass index. The data are expressed as the mean  $\pm$  SD. One-way ANOVA followed by Tukey's test (**a**); pearson correlation analysis (**b**). Source data are provided as a Source Data file.

## Supplementary Fig. 2

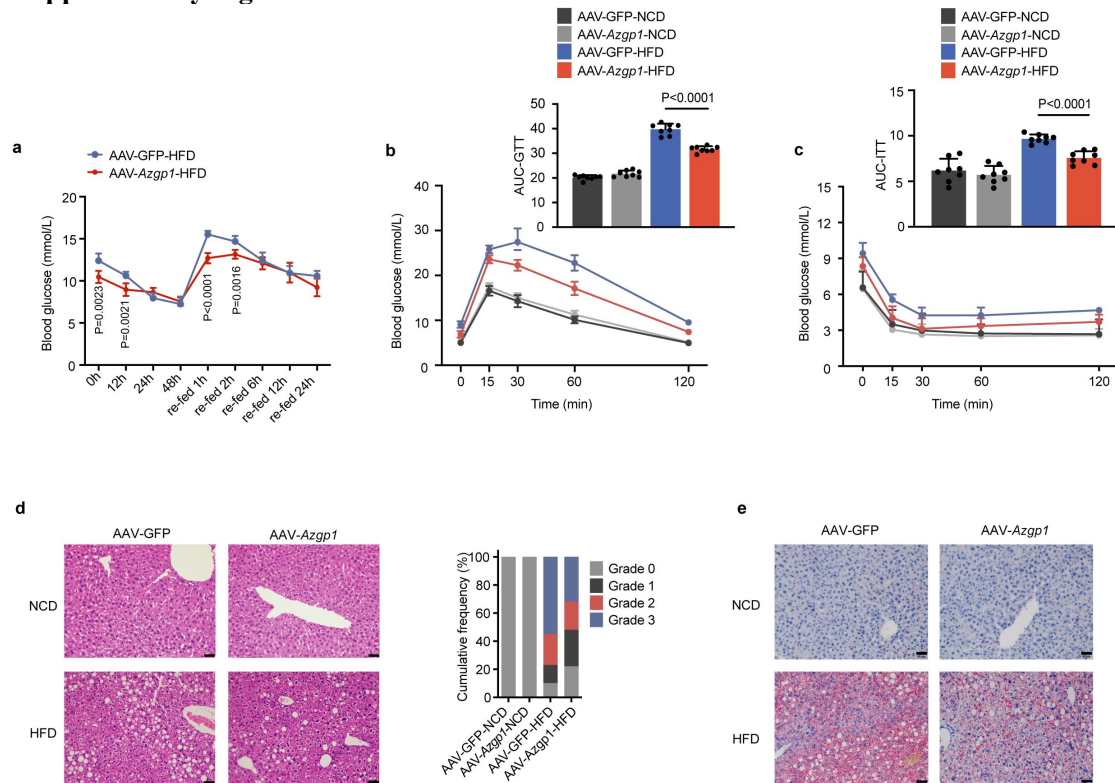

**Supplementary Fig. 2 Effects of AZGP1 overexpression in the hypothalamus on glucose/lipid metabolism and insulin sensitivity.** Eight-week-old male WT mice were injected with AAV9-*Azgp1*/GFP into the MBH and were fed a NCD or HFD for 12 weeks as described in the Methods. **a** Fasting and refeeding blood glucose levels in HFD-fed mice (n = 8 mice). **b, c** Blood glucose levels and the AUC of the GTT (**b**) and ITT (**c**) curves in NCD- and HFD-fed mice (n = 8 mice). **d** Representative H&E staining of the liver in NCD- and HFD-fed mice and quantitation of the grade of steatosis (n = 6 mice; scale bars: 50  $\mu$ m). **e** Oil Red O staining of the liver in NCD- and HFD-fed mice (n = 6 mice; scale bars: 50  $\mu$ m). GTT, glucose tolerance test; ITT, insulin tolerance test; AUC, area under the curve. The data are expressed as the mean  $\pm$  SEM. Statistical significance was calculated using an unpaired two-tailed t-test (**a**) and two-way ANOVA followed by Bonferroni's post hoc tests (**b-c**). Source data are provided as a Source Data file.

### Supplementary Fig. 3

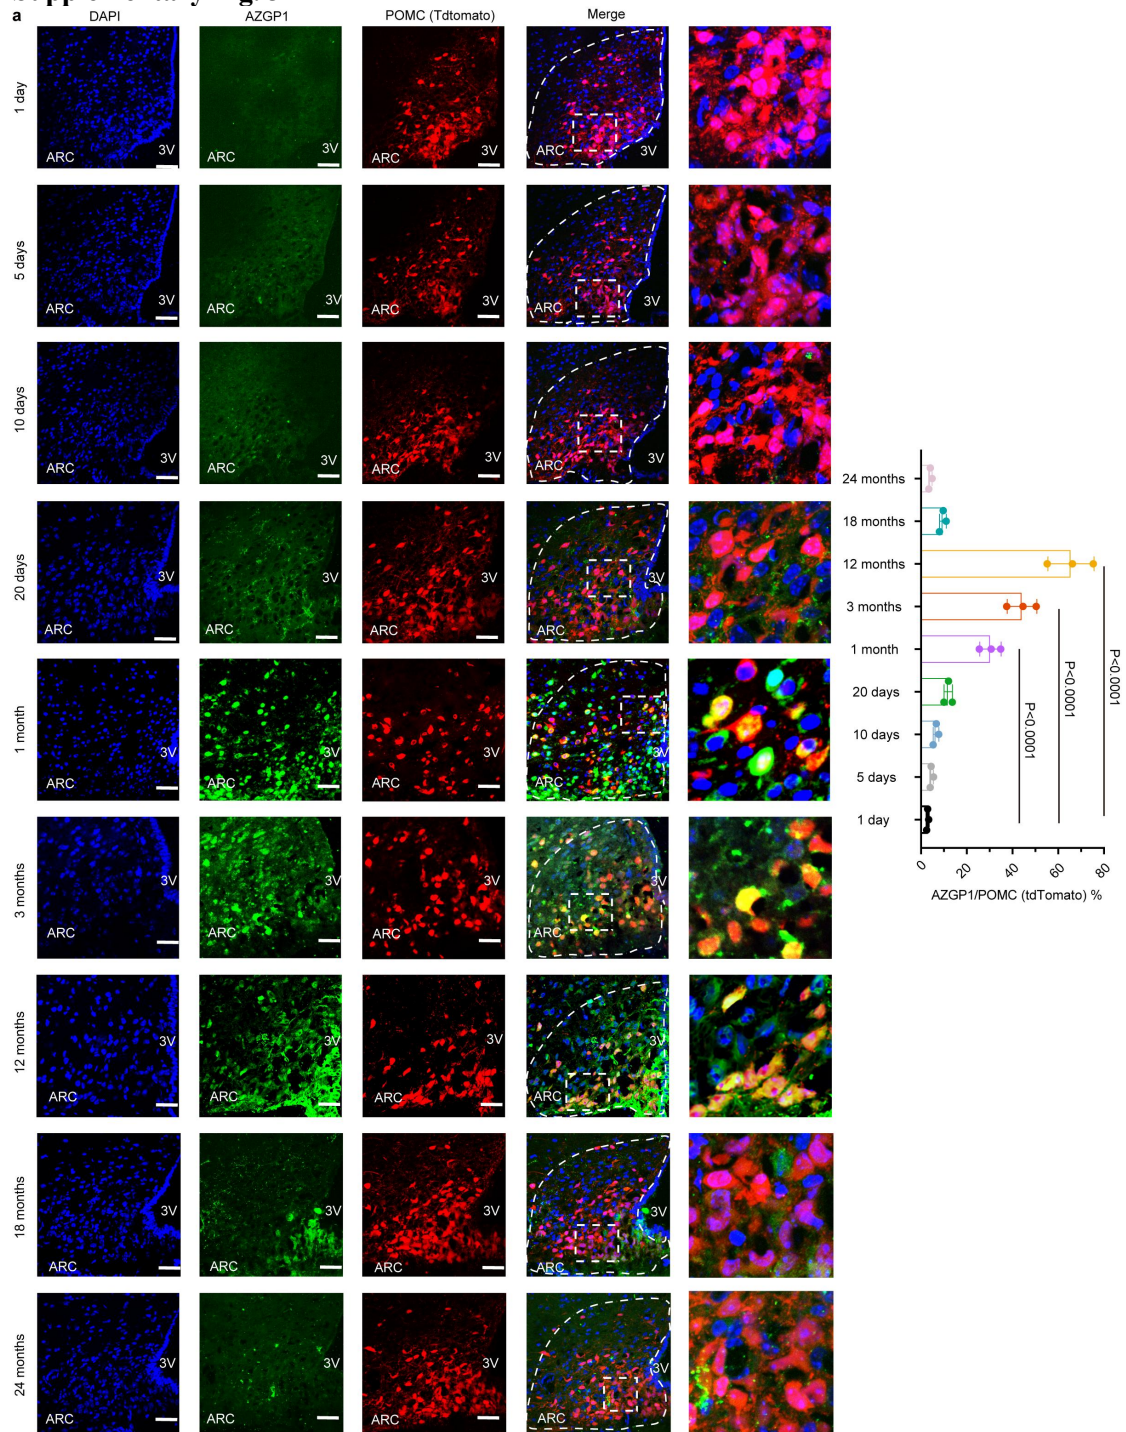

**Supplementary Fig. 3 IF staining of AZGP1 in POMC neurons at different developmental stages in mice.** (n = 3 mice); scale bars: 50  $\mu$ m. ARC, arcuate nucleus; 3V, third cerebral ventricle. The data are expressed as the mean  $\pm$  SEM. One-way ANOVA followed by Tukey's test (**a**). Source data are provided as a Source Data file.



**Supplementary Fig. 4**

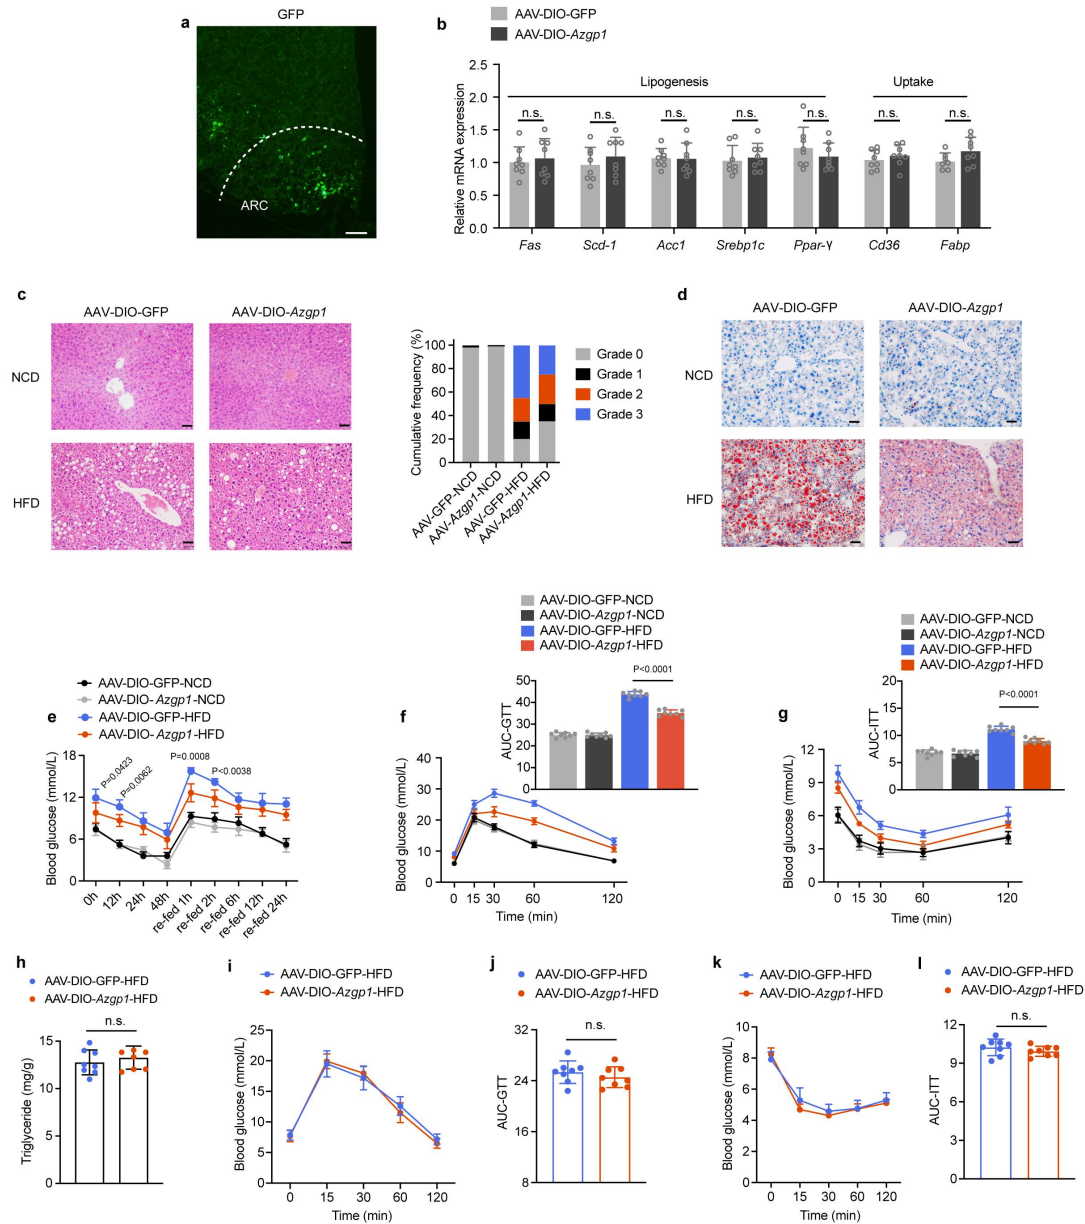

**Supplementary Fig. 4 Effects of AZGP1 overexpression in POMC neurons on glucose/lipid metabolism.** Eight-week-old male POMC-Cre mice received bilateral injections of AAV9-DIO-Azgp1/GFP into the MBH and were fed a NCD or HFD for 12 weeks as described in the Methods. **a** Representative IF image showing GFP expression in the mouse hypothalamus (n = 3 mice). **b** Lipid metabolism-related gene expression in eWAT in HFD-fed mice (n = 8 mice). **c** Representative H&E staining of liver sections and quantitation of the grade of steatosis (n = 5 mice; scale bars: 50 μm). **d** Oil Red O staining of representative liver sections (n = 5 mice; scale bars: 50 μm). **e** Fasting and refeeding blood glucose levels (n = 9

mice). **f, g** Blood glucose levels and the AUC of the GTT (**f**) and the ITT curves (n = 8 mice). **h-l** Eight-week-old male POMC-Cre mice were given injections of AAV9-DIO-*Azgp1*/GFP into the bilateral MBH and were fed a HFD for 4 weeks. (**h**) TG levels in the liver (n = 8 mice). (**i-l**) Blood glucose levels and the AUC of the GTT and ITT curves (n = 8 mice). ARC, arcuate nucleus; VMH, ventromedial nucleus; 3V, third cerebral ventricle; GTT, glucose tolerance test; ITT, insulin tolerance test; AUC, area under the curve. The data are expressed as the mean  $\pm$  SEM. Two-tailed Student's t tests were used in (**b**), (**h-l**), and two-way ANOVA with Bonferroni post-hoc tests were used in (**e-g**). Source data are provided as a Source Data file. (n.s. not significant.).

## Supplementary Fig. 5

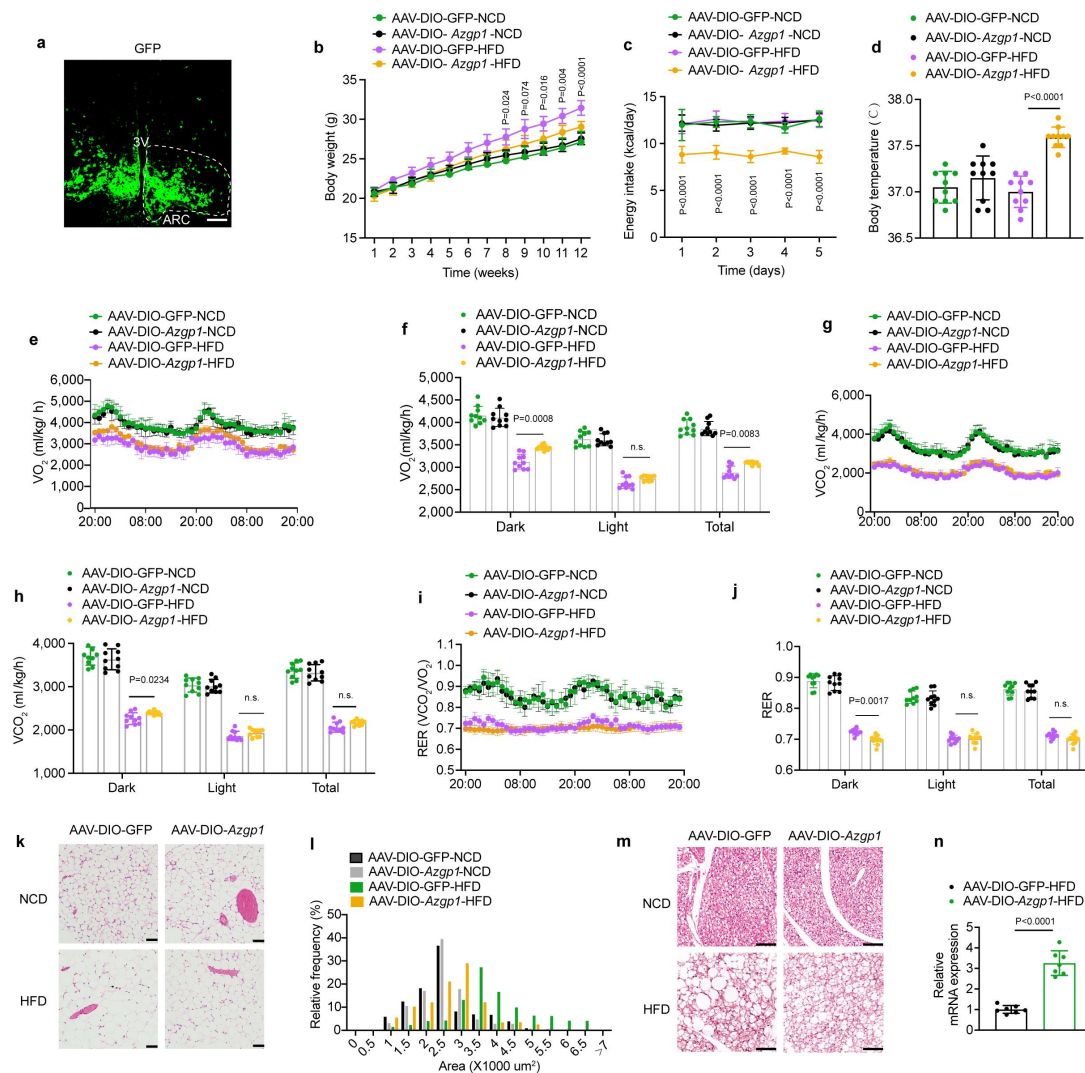

**Supplementary Fig. 5 Specific overexpression of AZGP1 in POMC neurons increases energy expenditure and ameliorates metabolic disorders in HFD-fed female mice.**

Eight-week-old female POMC-Cre mice were injected with AAV9-DIO-*Azgp1*/GFP into the bilateral MBH and were fed a NCD or HFD for 12 weeks as described in the Methods. **a** Representative IF image showing GFP expression in the ARC. **b** Body weight curve (n = 8 mice). **c** Energy intake (n = 10 mice). **d** Rectal temperature (n = 10 mice). **e, f** Forty-eight hours oxygen consumption (n = 10 mice). **g, h** Forty-eight hours carbon dioxide consumption (n = 10 mice). **i, j** Respiratory exchange ratio (RER,  $VCO_2/VO_2$ ) (n = 10 mice). **k** Representative H&E staining image of eWAT (n = 5 mice; scale bar: 50  $\mu$ m). **l** Cross-sectional area of eWAT quantified by ImageJ (n = 5 mice). **m** Representative H&E staining image of

BAT (n = 5 mice; scale bar: 100  $\mu$ m). **n** The mRNA expression of *Ucp1* (n = 7 mice). ARC, arcuate nucleus; 3V, third cerebral ventricle. The data are expressed as the mean  $\pm$  SEM. Two-way ANOVA followed by Holm-Šídák multiple comparisons test (**b, c; f, h, j**); One-way ANOVA followed by Tukey's test (**d**) ; Two-tailed Student's t test (**n**). Source data are provided as a Source Data file. (n.s. not significant.).



**Supplementary Fig. 6**

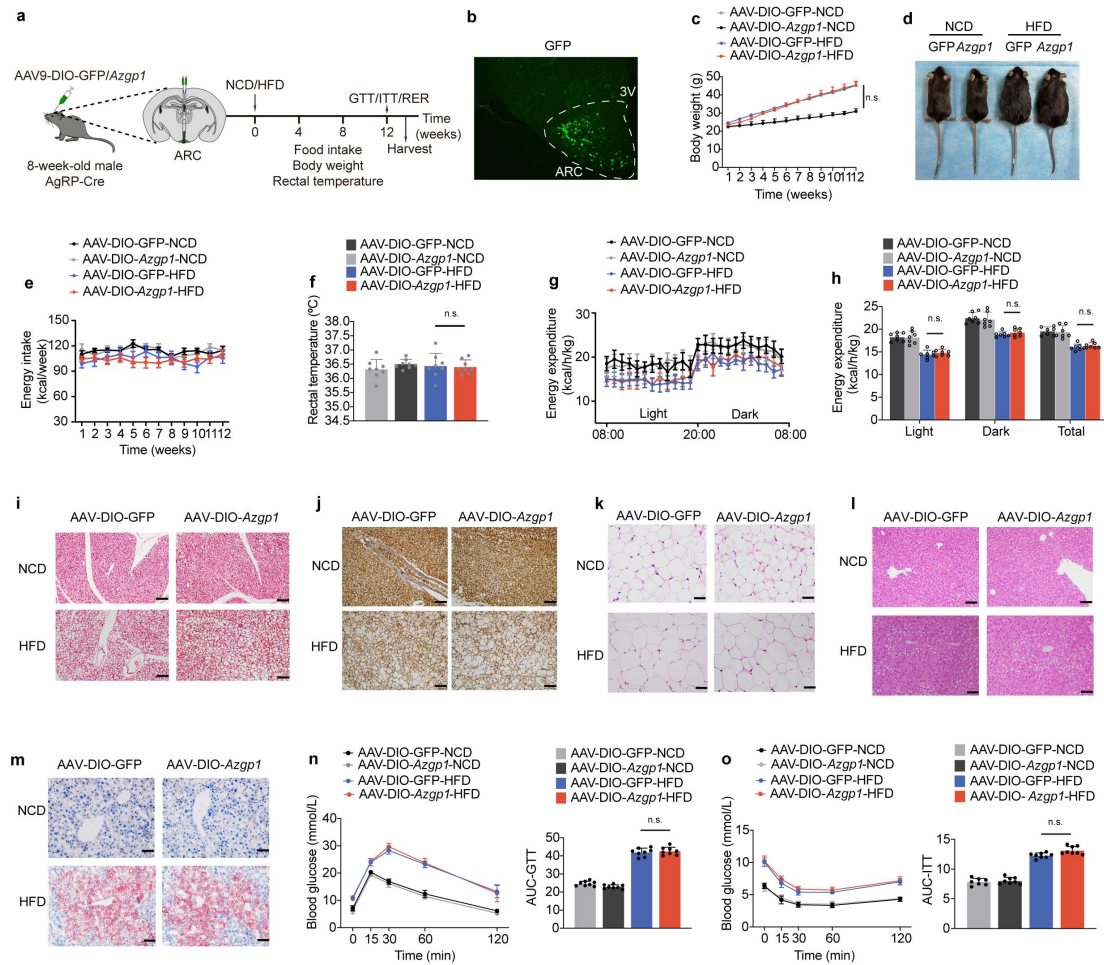

**Supplementary Fig. 6 Overexpression of AZGP1 in AgRP neurons did not affect energy balance.** **a** Schematic diagram of the experimental procedure. **b** IF staining image showing GFP expression in the ARC. **c** Body weight curve (n = 8 mice). **d** Representative photograph of mice. **e** Energy intake (n = 7 mice). **f** Rectal temperature (n = 8 mice). **g, h** Energy expenditure (n = 7 mice). **i** H&E staining of BAT (n = 5 mice; scale bars: 100  $\mu$ m). **j** UCP1 immunostaining of BAT (n = 5 mice; scale bars: 100  $\mu$ m). **k** H&E staining of eWAT (n = 5 mice; scale bars: 50  $\mu$ m). **l** H&E staining of the liver (n = 5 mice; scale bars: 50  $\mu$ m). **m** Oil Red O staining of the liver (n = 5 mice; scale bars: 50  $\mu$ m). **n, o** Blood glucose levels and the AUC of the GTT (**n**) and ITT (**o**) curves (n = 8 mice). ARC, arcuate nucleus; 3V, third cerebral ventricle; GTT, glucose tolerance test; ITT, insulin tolerance test; AUC, area under the curve. The data are expressed as the mean  $\pm$  SEM; one-way ANOVA followed by Tukey's

test **(f)**, two-way ANOVA followed by Bonferroni's post hoc tests **(c, e; h; n; o)**. Source data are provided as a Source Data file. (n.s. not significant.).

**Supplementary Fig. 7**

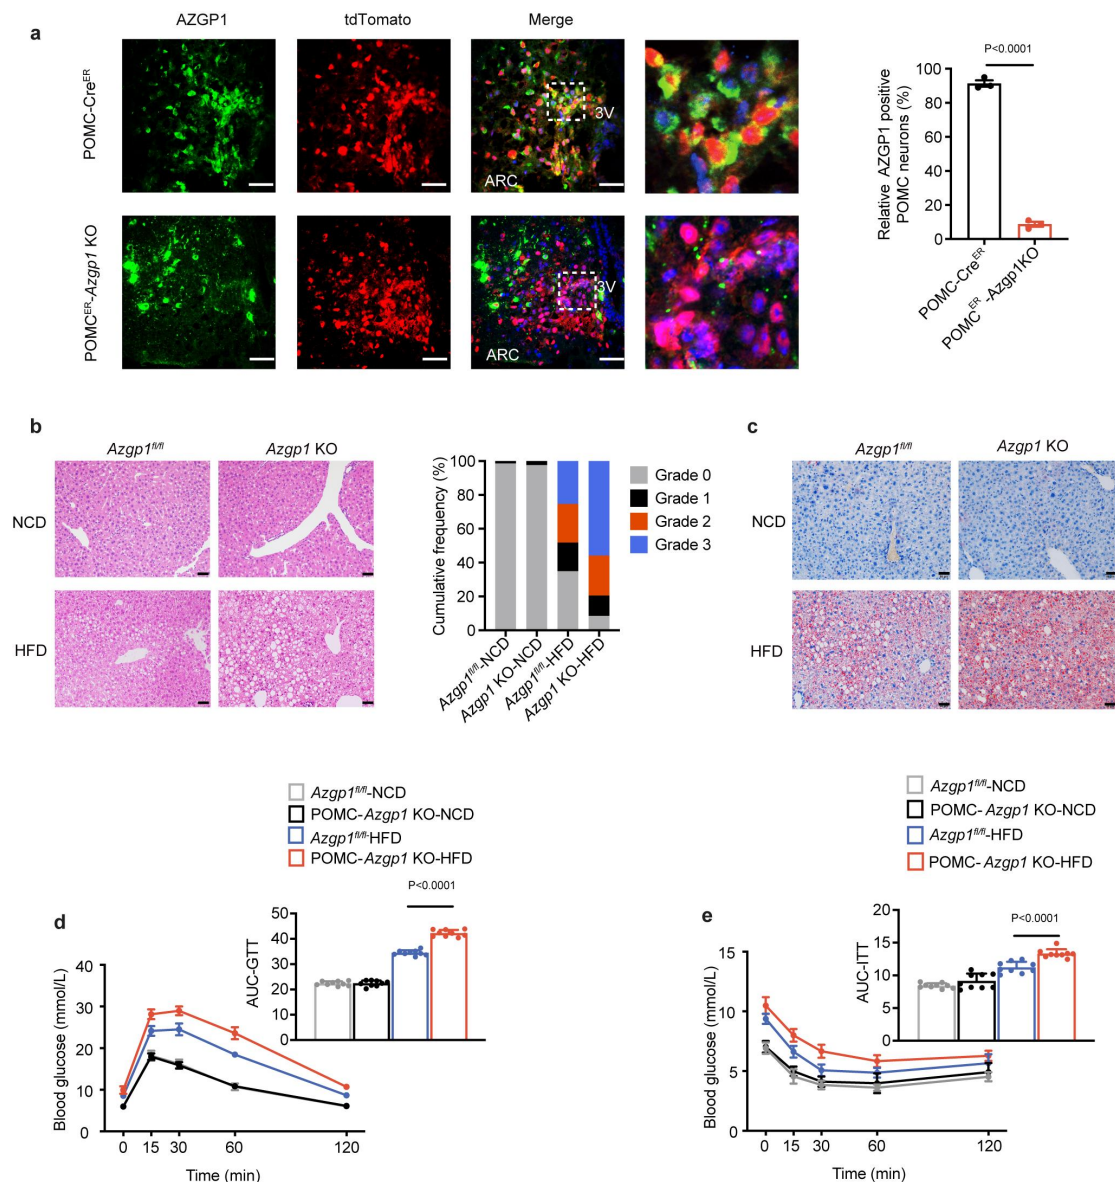

**Supplementary Fig. 7 Effects of *Azgp1* ablation in POMC neurons on lipid metabolism.**

**a** IF staining of AZGP1 in the ARC POMC neurons (tdTomato) of POMC-*Azgp1* KO or POMC-Cre<sup>ER</sup> mice ( $n = 3$  mice; scale bars: 50  $\mu$ m). **b, c** POMC-*Azgp1* KO and *Azgp1*<sup>fl/fl</sup> mice were fed a NCD or HFD for 12 weeks. H&E staining of liver sections and quantitation of the grade of steatosis (**b**) ( $n = 5$  mice; scale bars: 50  $\mu$ m). **c** Oil Red O staining of liver sections ( $n = 5$  mice; scale bars: 50  $\mu$ m). **d, e** Blood glucose levels and the AUC of the GTT (**d**) and the ITT (**e**) curves ( $n = 9$  mice). ARC, arcuate nucleus; 3V, third cerebral ventricle; GTT, glucose tolerance test; ITT, insulin tolerance test; AUC, area under the curve. The data are expressed as the mean  $\pm$  SEM. Two-tailed Student's *t* tests were used in (**a**) and two-way ANOVA with

Bonferroni post-hoc tests were used in **(d)**, **(e)**. Source data are provided as a Source Data file.

**Supplementary Fig. 8**

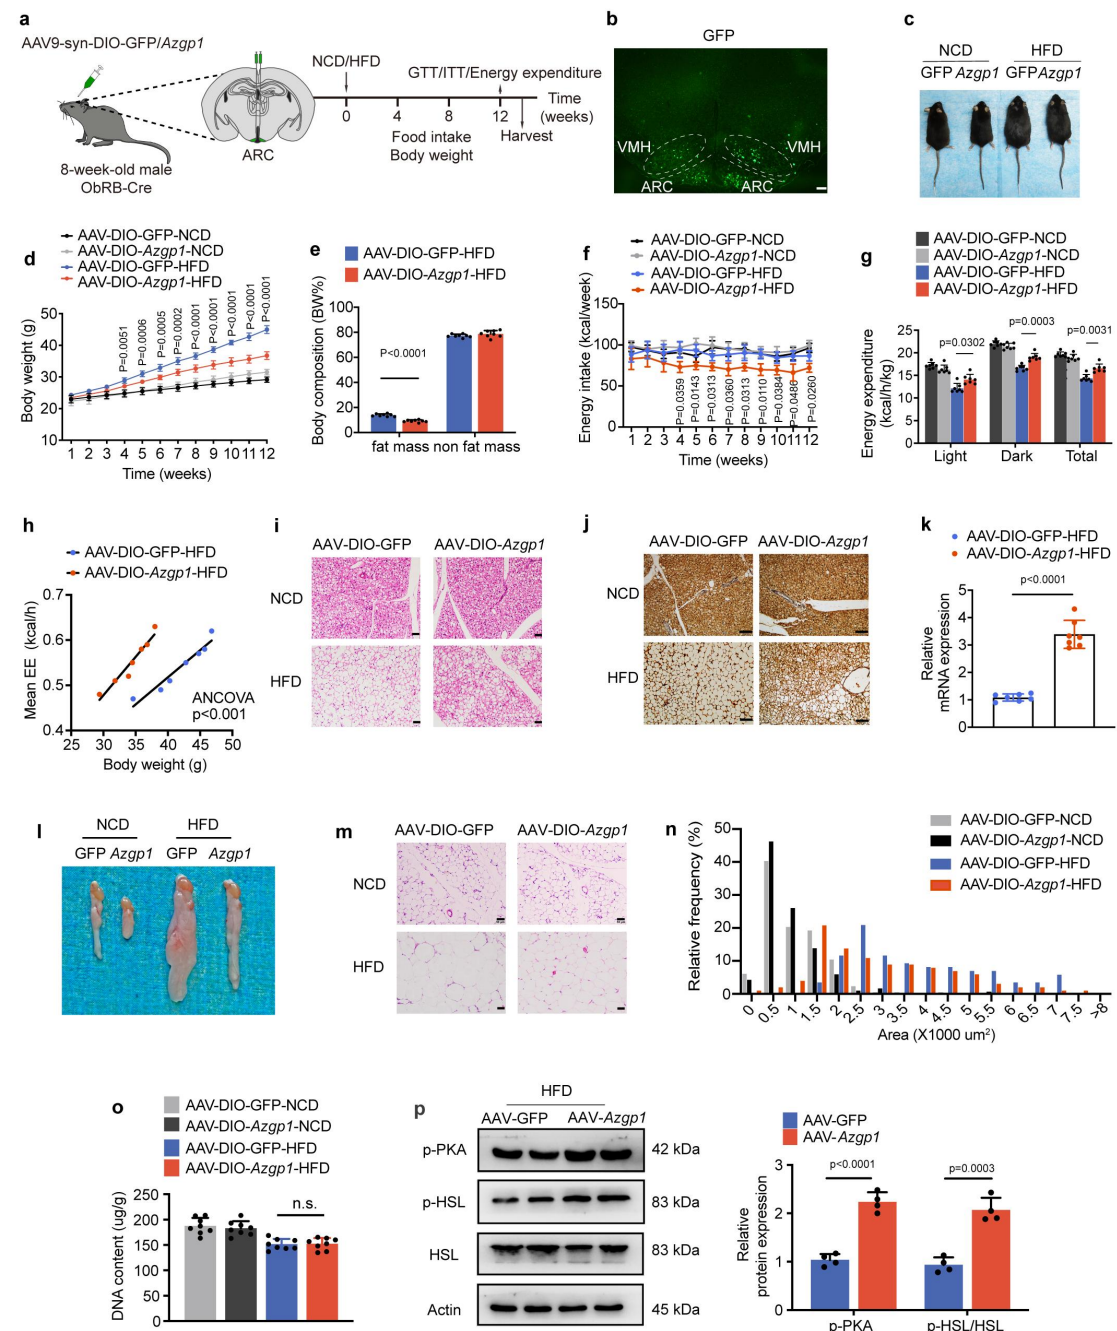

**Supplementary Fig. 8 Overexpression of AZGP1 in ObRb neurons promotes energy expenditure in HFD-fed mice.** **a** Schematic diagram of the experimental procedure. **b** IF staining of GFP expression in the ARC and VMH (n = 3 mice; scale bars: 200 μm). **c** A representative photograph of mice. **d** Body weight curve (n = 7 mice). **e** Body composition (n = 8 mice). **f** Energy intake (n = 5 mice). **g** Energy expenditure (n = 7 mice). **h** ANCOVA of energy expenditure versus body weight in HFD-fed mice (n = 7 mice). **i** Representative H&E staining images of BAT (n = 5 mice; scale bars: 50 μm). **j** UCP1 immunostaining in BAT (n =

5 mice; scale bars, 100  $\mu$ m). **k** *Ucp1* mRNA expression in BAT (n = 7 mice). **l** Representative image of eWAT depots. **m** Representative H&E staining image of eWAT (n = 5 mice; scale bars: 50  $\mu$ m). **n** Cross-sectional area of eWAT quantified by ImageJ (n = 5 mice; scale bars: 50  $\mu$ m). **o** DNA content in eWAT (n = 8 mice). **p** Western blot analysis of p-PKA and p-HSL/HSL expression in eWAT of HFD-fed mice and densitometric quantification (n = 4 mice). ARC, arcuate nucleus; VMH, ventromedial nucleus. The data are expressed as the mean  $\pm$  SEM. Two-tailed Student's t tests were used in (**e**, **k**, **o**, **p**), one-way ANCOVA using body weight as covariate (**h**) and two-way ANOVA with Bonferroni post-hoc tests were used in (**d**, **f**, **g**, ). Source data are provided as a Source Data file. (n.s. not significant.).



**Supplementary Fig. 9**

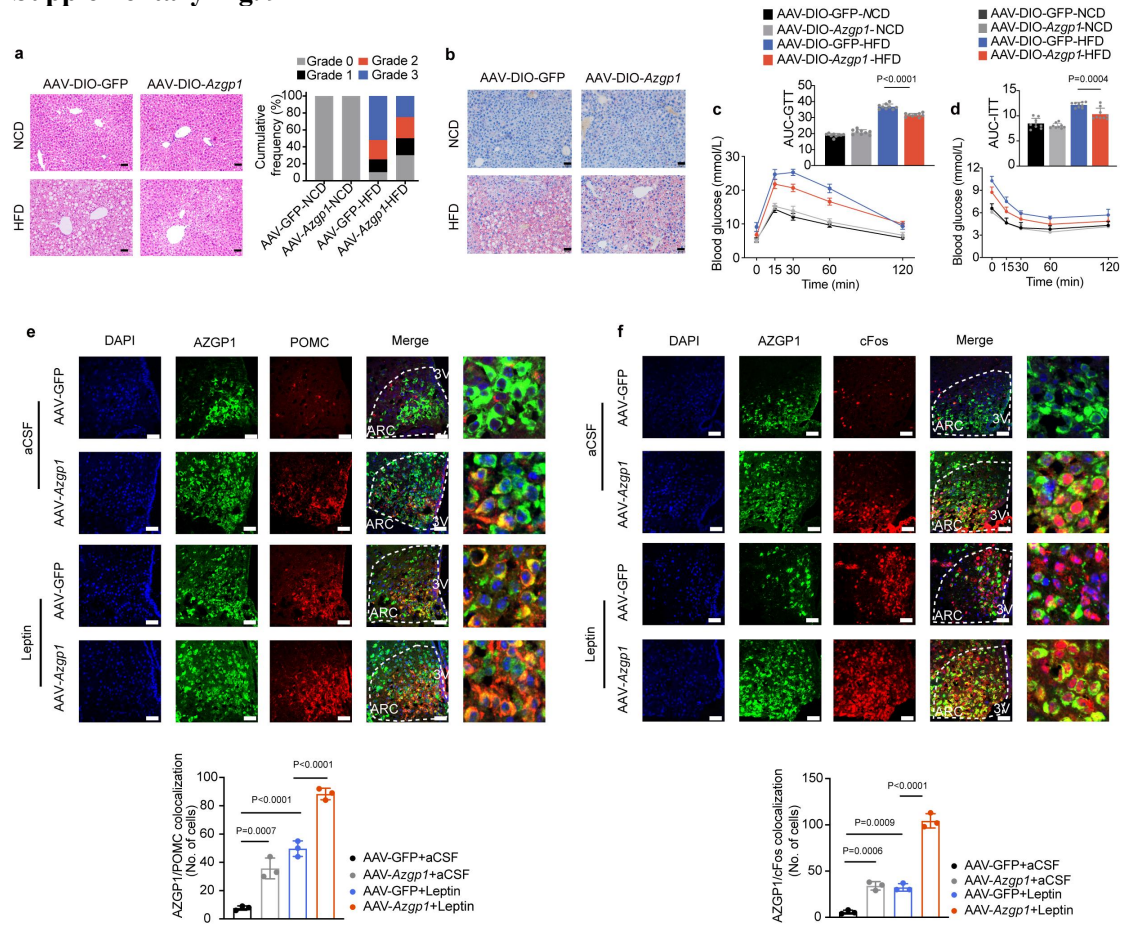

**Supplementary Fig. 9 Effects of AZGP1 overexpression in ObRb neurons on glucose/lipid metabolism and the excitability of neurons.** Eight-week-old male ObRb-Cre mice were injected with AAV9-DIO-*Azgp1*/GFP into the MBH and fed a NCD or HFD for 12 weeks. **a** Representative H&E staining of liver sections and quantitation of the grade of steatosis ( $n = 5$  mice; scale bars: 50  $\mu$ m). **b** Oil Red O staining of the liver sections ( $n = 5$  mice; scale bars: 50  $\mu$ m). **c, d** Blood glucose levels and the AUC of the GTT (**c**) and ITT (**d**) curves ( $n = 9$  mice). **e, f** IF staining for Azgp1 and POMC expression (**e**), and cFos (**f**) in the ARC of HFD-fed mice with or without MBH leptin ( $n = 3$  mice; Scale bars: 50 $\mu$ m). ARC, arcuate nucleus; 3V, third cerebral ventricle; GTT, glucose tolerance test; ITT, insulin tolerance test; AUC, area under the curve. The data are expressed as the mean  $\pm$  SEM. Two-way ANOVA with Bonferroni post-hoc tests were used in (**c–f**). Source data are provided as a Source Data file.

## Supplementary Fig. 10

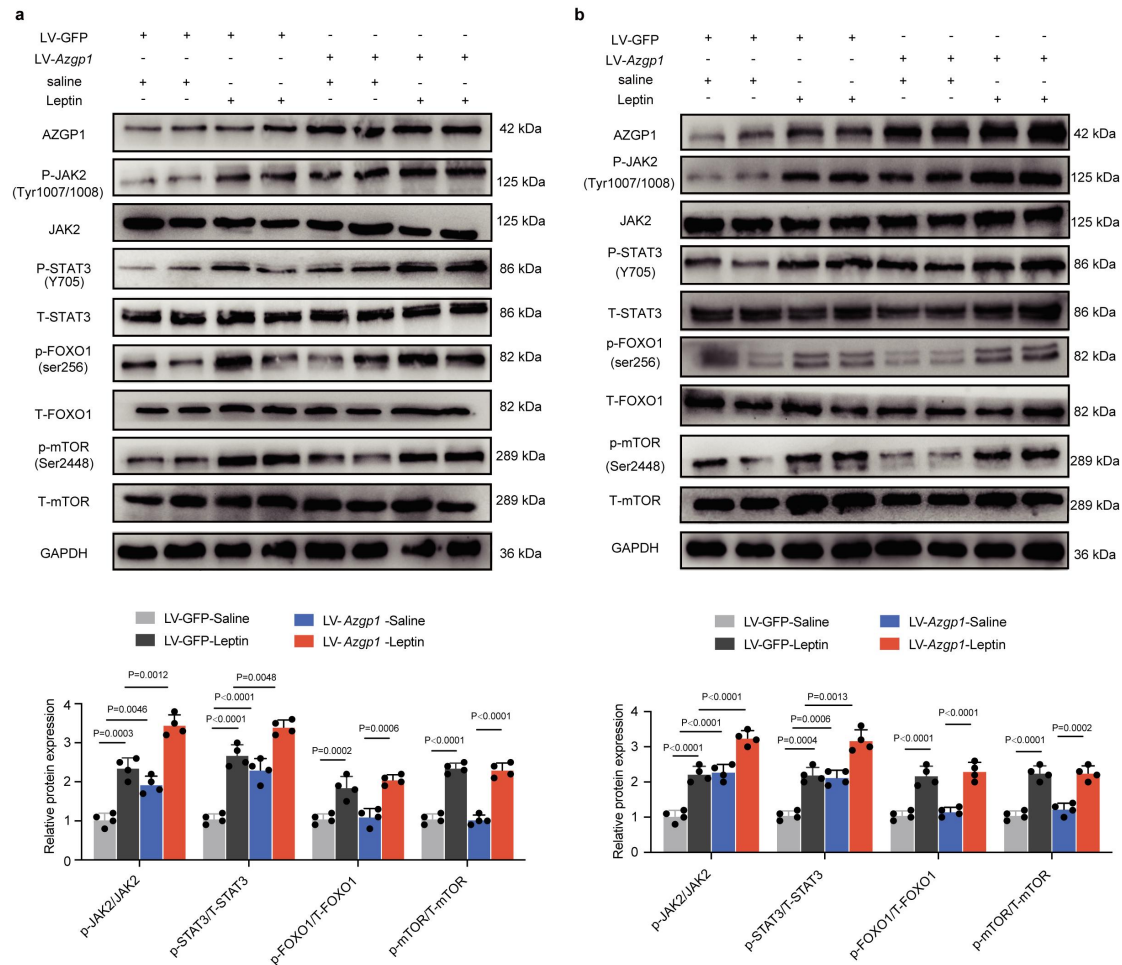

**Supplementary Fig. 10 Overexpression of AZGP1 increases leptin-mediated STAT3 phosphorylation *in vitro*.** GT1-7 and N2A cells were transfected with LV-Azgp1/GFP and treated with or without leptin as described in the Methods section. **a, b** Western blot analysis of the expression of metabolism-related signaling pathway components in GT1-7 (**a**) and N2A (**b**) cells (n = 4 independent cell experiments). The data are expressed as the mean  $\pm$  SEM. Two-way ANOVA with Bonferroni post-hoc tests were used in (**a, b**). Source data are provided as a Source Data file.

**Supplementary Fig. 11**

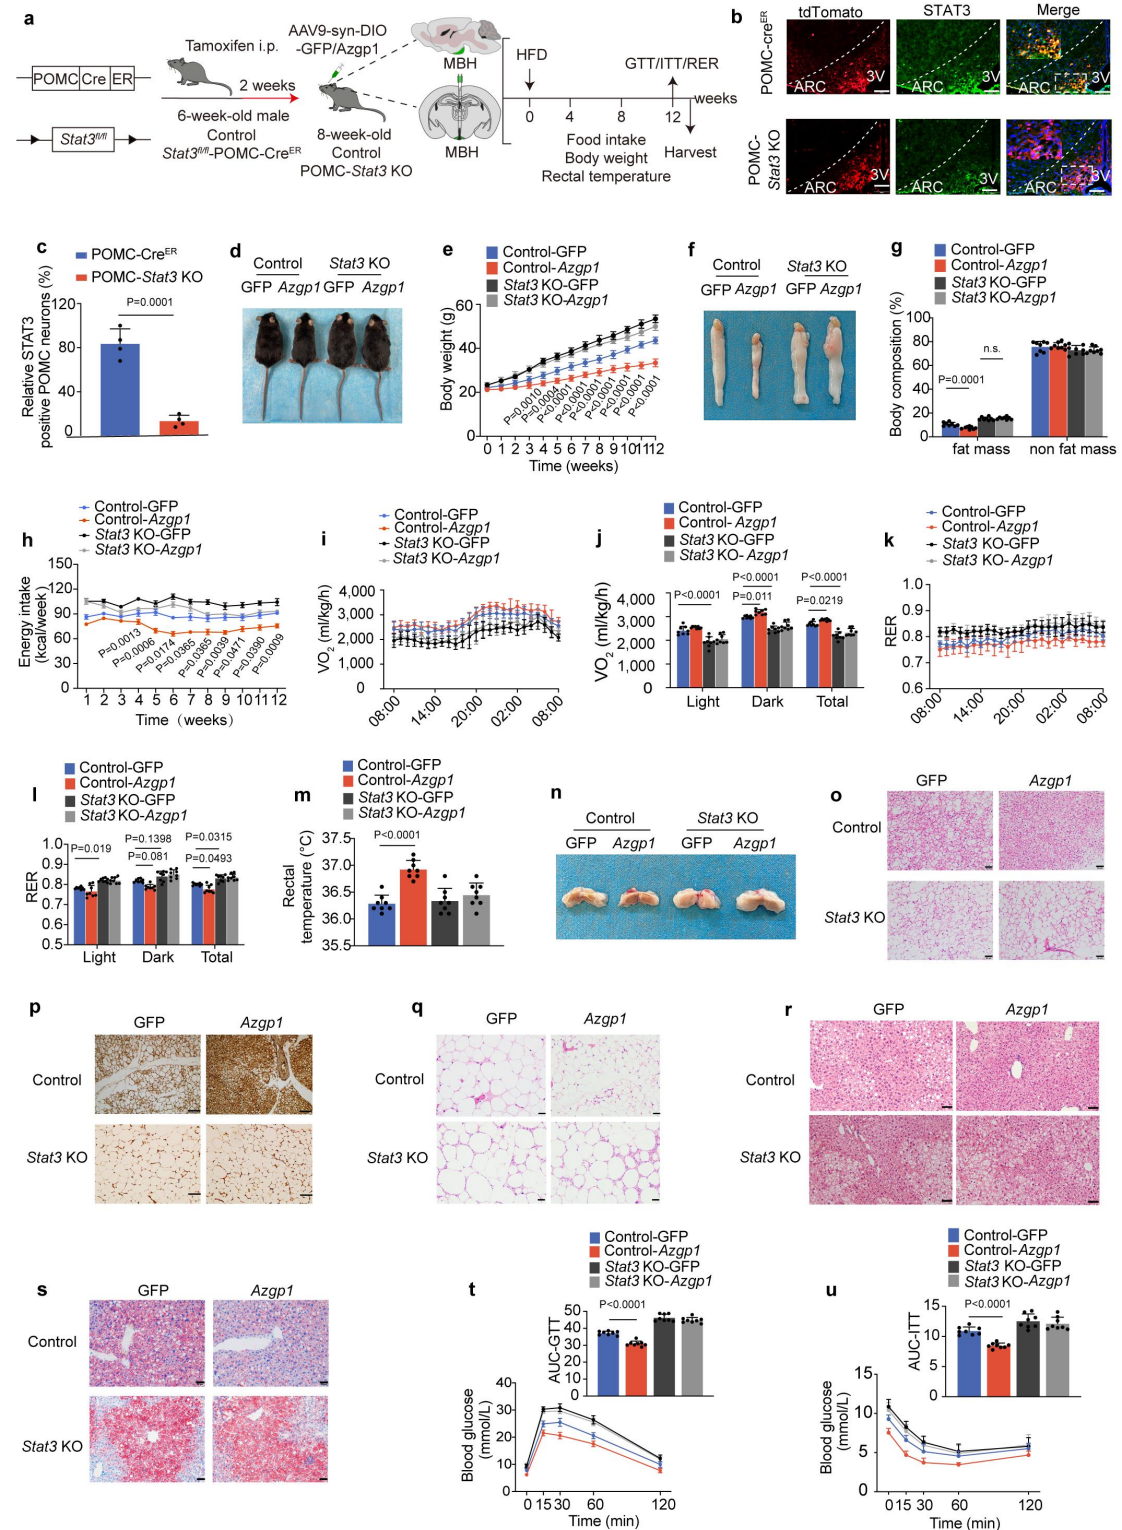

**Supplementary Fig. 11 Inducible deletion of *Stat3* in POMC neurons abolishes the effect of central AZGP1 on energy metabolism.** **a** Schematic diagram of the experimental procedure. **b** IF images showing STAT3 in POMC neurons (tdTomato) in the ARC (n = 4

mice; scale bars: 100  $\mu$ m). **c** Densitometric quantification of STAT3 expression in **(b)**. **d** Representative photograph of mice. **e** Body weight curve (n = 8 mice). **f** Representative images of eWAT depots. **g** Body composition (n = 8 mice). **h** Energy intake (n = 8 mice). **i, j** Twenty-four hours oxygen consumption ( $VO_2$ ) (n = 8 mice). **k, l** Respiratory exchange ratio (RER:  $VCO_2/VO_2$ ) (n = 8 mice). **m** Rectal temperature (n = 8 mice). **n** Representative images of BAT depots. **o** H&E staining of BAT (n = 5 mice; scale bars: 50  $\mu$ m). **p** UCP1 immunostaining of BAT (n = 5 mice; Scale bars: 100  $\mu$ m). **q** H&E staining of eWAT (n = 5 mice; scale bars: 50  $\mu$ m). **r** H&E staining of the liver (n = 5 mice; scale bars: 100  $\mu$ m). **s** Oil Red O staining of the liver (n = 5 mice; scale bars: 50  $\mu$ m). **t, u** Blood glucose levels and the AUC of the GTT (**t**) and ITT (**u**) curves (n = 8 mice). 3V, third cerebral ventricle; ARC, arcuate nucleus; GTT, glucose tolerance test; ITT, insulin tolerance test; AUC, area under the curve. The data are expressed as the mean  $\pm$  SEM. Two-tailed Student's t tests were used in **(c)**; and two-way ANOVA with Bonferroni post-hoc tests were used in **(e, g, h, j, l, t, u)**. one-way ANOVA followed by Tukey's test (**m**). Source data are provided as a Source Data file.



**Supplementary Fig. 12**

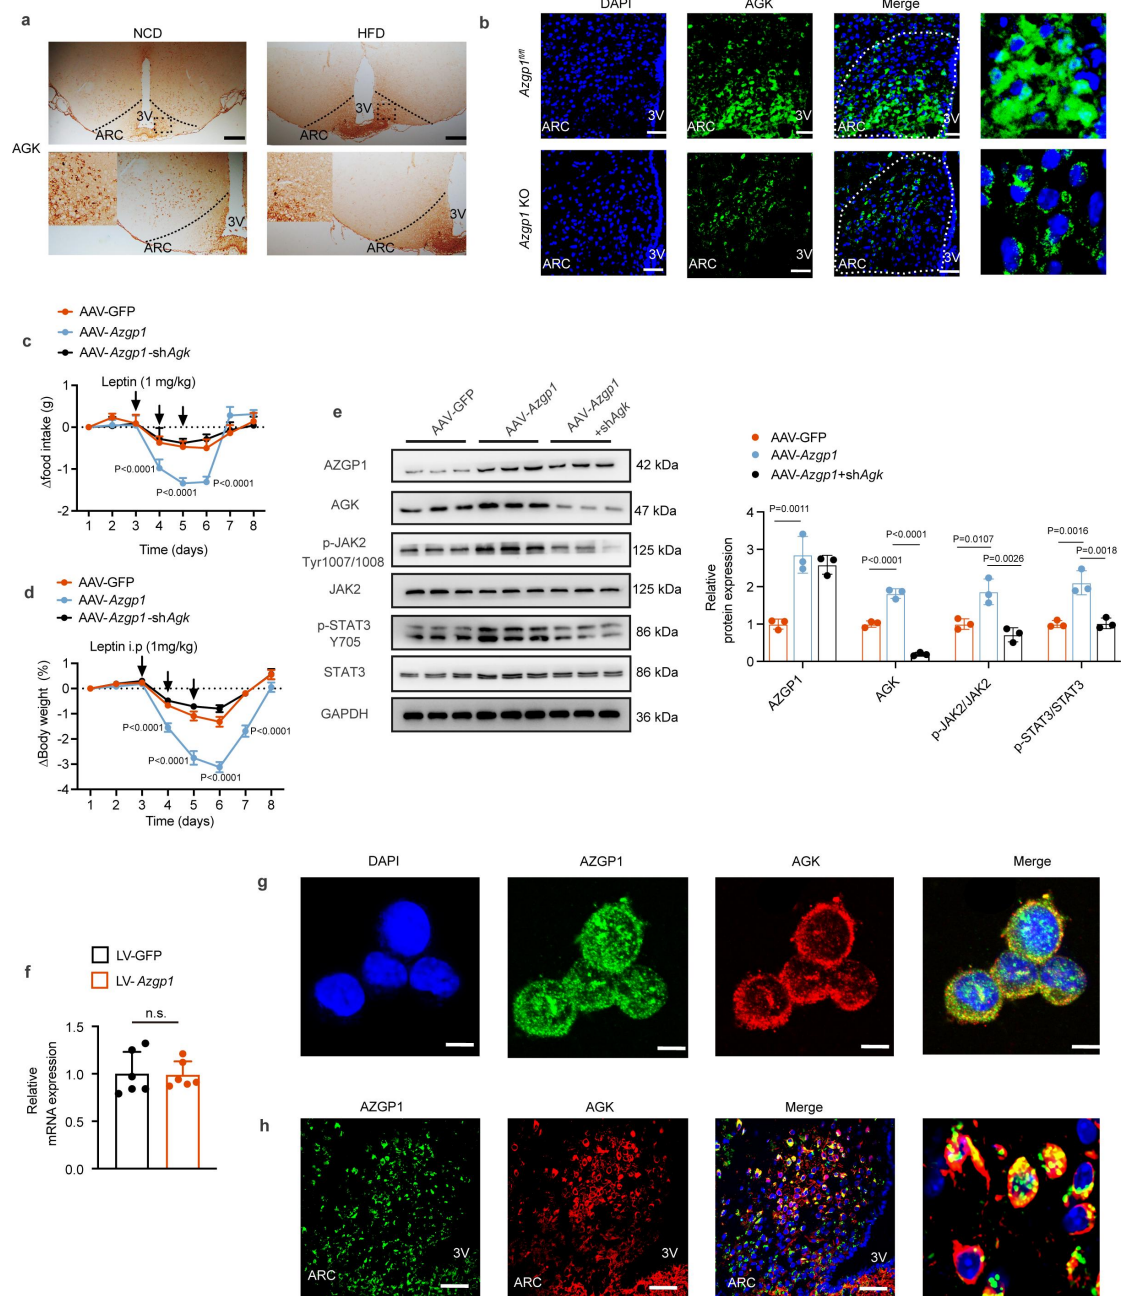

**Supplementary Fig. 12 AGK expression is downregulated by HFD in the hypothalamus and is associated with AZGP1. a** IHC staining of AGK expression in the hypothalamic ARC of NCD- or HFD-fed WT mice (n = 3 mice; Scale bars: 100μm). **b** IF staining showing AGK expression in the hypothalamic ARC of HFD-fed *Azgp1<sup>fl/fl</sup>* and POMC-*Azgp1* KO mice (n = 3 mice; Scale bars: 100μm). **c-e** Eight-week-old male WT mice received MBH injection of AAV9-*Azgp1*/ GFP or AAV9-*Azgp1*+AAV9-shAgk and were fed a HFD for 4 weeks. For the

leptin sensitivity experiment, mice were intraperitoneally injected with leptin. **c** Changes in food intake (n = 10 mice). **d** Change in body weight (n = 10 mice). **e** Western blots showing AZGP1, AGK, t-JAK2/p-JAK2 (Tyr1007/1008), and t-STAT3/p-STAT3 (Y705) expression in the hypothalamus (n = 3 mice). **f** GT1-7 cells were transfected with or without LV-*Azgp1* as indicated in the Methods. AGK mRNA expression was measured by RT-PCR (n = 6 independent cell experiments). **g** IF staining showing the co-location of AZGP1 and AGK in N2A cells (n = 3 independent cell experiments; Scale bars: 100µm). **h** IF staining showing the colocation of AZGP1 and AGK in the MBH of WT mice (n = 3 independent cell experiments; Scale bars: 100µm). 3V, third cerebral ventricle; ARC, arcuate nucleus; Data were expressed as the mean ± SEM. Two-way ANOVA with Bonferroni post-hoc tests were used in (**c**, **d**); one-way ANOVA followed by Tukey's test (**e**); Two-tailed Student's t tests were used in (**f**) . Source data are provided as a Source Data file. (n.s. not significant.).



## Supplemental table

**Table S1 Anthropometric characteristics and metabolic indicators in the study population.**

| Variable                 | Lean        | Overweight              | Obesity                 |
|--------------------------|-------------|-------------------------|-------------------------|
| N (male/female)          | 135 (70/65) | 38 (20/18)              | 26 (13/13)              |
| Age (years)              | 25.5 ± 2.9  | 26.7 ± 4.0              | 26.54 ± 5.35            |
| BMI (kg/m <sup>2</sup> ) | 20.0 ± 1.9  | 25.8 ± 1.0 (p<0.0001)   | 30.9 ± 2.6 (p<0.0001)   |
| WHR                      | 0.80 ± 0.05 | 0.85 ± 0.05 (p<0.0001)  | 0.90 ± 0.05 (p<0.0001)  |
| FAT (%)                  | 26.3 ± 4.9  | 37.6 ± 3.8 (p<0.0001)   | 46.3 ± 5.2 (p<0.0001)   |
| TG (mmol/L)              | 0.97 ± 0.45 | 1.74 ± 1.06 (p<0.0001)  | 1.65 ± 0.91 (p<0.0001)  |
| TC (mmol/L)              | 4.02 ± 1.04 | 4.47 ± 1.01             | 4.42 ± 0.98             |
| HDL-C (mmol/L)           | 1.29 ± 0.59 | 1.29 ± 0.37             | 1.29 ± 0.65             |
| LDL-C (mmol/L)           | 2.24 ± 0.83 | 2.66 ± 0.91 (p=0.0104)  | 2.66 ± 0.47 (p=0.0332)  |
| FFA (mmol/L)             | 0.56 ± 0.26 | 0.61 ± 0.19             | 0.61 ± 0.20             |
| FBG (mmol/L)             | 4.58 ± 0.51 | 4.90 ± 0.57 (p=0.0035)  | 4.95 ± 0.70 (p=0.0038)  |
| 0.5h-BG (mmol/L)         | 7.65 ± 1.60 | 8.54 ± 1.88 (p=0.0070)  | 9.00 ± 1.47 (p=0.0003)  |
| 1h-BG (mmol/L)           | 6.68 ± 1.98 | 8.21 ± 2.47 (p=0.0003)  | 9.90 ± 2.41 (p<0.0001)  |
| 2h-BG (mmol/L)           | 5.79 ± 1.45 | 7.22 ± 2.30 (p<0.0001)  | 9.32 ± 2.45 (p<0.0001)  |
| FIns (mU/L)              | 8.73 ± 4.52 | 16.9 ± 11.6 (p<0.0001)  | 27.2 ± 20.9 (p<0.0001)  |
| 0.5h-Ins (mU/L)          | 90.0 ± 63.2 | 130.3 ± 90.3 (p=0.0025) | 124.8 ± 41.4 (p=0.0319) |
| 1h-Ins (mU/L)            | 76.3 ± 55.1 | 136.8 ± 84.4 (p<0.0001) | 161.7 ± 79.0 (p<0.0001) |
| 2h-Ins (mU/L)            | 59.6 ± 46.8 | 130.3 ± 94.2 (p<0.0001) | 182.7 ± 91.2 (p<0.0001) |
| HbA1c (%)                | 5.23 ± 0.28 | 5.30 ± 0.33             | 5.45 ± 0.40 (p=0.0020)  |

BMI, body mass index; FFA, free fatty acid; FBG, fasting blood glucose; 2h-BG, 2h-blood glucose after oral glucose tolerance test; FIns, Fasting insulin levels; 2h-Ins, 2h-insulin after oral glucose tolerance test; HDL-C, high-density lipoprotein cholesterol; LDL-C, low-density lipoprotein cholesterol; TC, total cholesterol; TG, triglyceride; WHR, waist-hip ratio. Values are given as means ± SD. The statistical significance of differences were assessed by one-way ANOVA, followed by Dunnett multiple comparison test.

**Table S2 The antibodies used for IF and IHC**

| Antibody                         | Source                              | Dilution |
|----------------------------------|-------------------------------------|----------|
| Anti-POMC, rabbit monoclonal     | #23499, Cell Signaling Technology   | 1:500    |
| Anti-AgRP, rabbit monoclonal     | ab254558, Abcam                     | 1:500    |
| Anti-AZGP1, mouse monoclonal     | sc-271957, Santa Cruz Biotechnology | 1:200    |
| Anti-cFos, mouse monoclonal      | ab208942, Abcam                     | 1:1000   |
| Anti-AGK, rabbit polyclonal      | ab137616, Abcam                     | 1:500    |
| Anti-NeuN, rabbit polyclonal     | 26975-1-AP, Proteintech             | 1:500    |
| Anti-GFAP, rabbit polyclonal     | 16825-1-AP, Proteintech             | 1:500    |
| Anti-STAT3, rabbit monoclonal    | # 12640, Cell Signaling Technology  | 1:500    |
| Anti-p-STAT3, rabbit monoclonal  | # 9145, Cell Signaling Technology   | 1:500    |
| Goat-anti-mouse IgG, polyclonal  | A32723 or A32727, Invitrogen        | 1:1000   |
| Goat-anti-rabbit IgG, polyclonal | A32732 or A-11034, Invitrogen       | 1:1000   |

**Table S3 The antibodies used for Western blots**

| Antibody                         | Source                              | Dilution |
|----------------------------------|-------------------------------------|----------|
| Anti-AZGP1, rabbit polyclonal    | orb354031, Biorbyt Ltd              | 1:1000   |
| Anti-AGK, rabbit polyclonal      | ab137616, Abcam                     | 1:1000   |
| Anti-t-STAT3, mouse monoclonal   | #9139s, Cell Signaling Technology   | 1:1000   |
| Anti-p-STAT3, rabbit monoclonal  | #9145s, Cell Signaling Technology   | 1:1000   |
| Anti-t-JAK2, rabbit monoclonal   | #3230s, Cell Signaling Technology   | 1:1000   |
| Anti-p-JAK2, rabbit polyclonal   | #3771s, Cell Signaling Technology   | 1:1000   |
| Anti-t-FOXO1, rabbit monoclonal  | #2880s, Cell Signaling Technology   | 1:1000   |
| Anti-p-FOXO1, rabbit monoclonal  | # 84192s, Cell Signaling Technology | 1:1000   |
| Anti-T-mTOR, rabbit monoclonal   | #2983s, Cell Signaling Technology   | 1:1000   |
| Anti-p-mTOR, rabbit monoclonal   | #5536s, Cell Signaling Technology   | 1:1000   |
| Anti-HSL, rabbit monoclonal      | #18381, Cell Signaling Technology   | 1:1000   |
| Anti-p-HSL, mouse polyclonal     | #4137, Cell Signaling Technology    | 1:1000   |
| Anti-p-PKA, rabbit monoclonal    | #9624, Cell Signaling Technology    | 1:1000   |
| Anti-Ub, Rabbit polyclonal       | #10201-2-AP, Proteintech            | 1:1000   |
| Anti-Flag, Rabbit polyclonal     | #20543-1-AP, Proteintech            | 1:2000   |
| Anti-Myc, Rabbit polyclonal      | #16286-1-AP, Proteintech            | 1:2000   |
| Anti-HA, Rabbit polyclonal       | #51064-2-AP, Proteintech            | 1:2000   |
| Anti-GAPDH, Rabbit polyclonal    | #5174, Cell Signaling Technology    | 1:1000   |
| Goat-anti-Rabbit IgG, polyclonal | #SA00001-2, Proteintech             | 1:8000   |
| Goat-anti-Mouse IgG, polyclonal  | #SA00001-1, Proteintech             | 1:8000   |

**Table S4 The primers used for RT-PCR**

| Gene Name                       | Sequence                                                 |
|---------------------------------|----------------------------------------------------------|
| <i>Pomc</i>                     | R: CATTAGGCTTGGAGCAGGTC<br>F: TCTTGATGATGGCGTTCTTG       |
| <i>Agrp</i>                     | R: GGCCTCAAGAAGACAACCTGC<br>F: GCAAAAGGCATTGAAGAAGC      |
| <i>Npy</i>                      | R: AAGAGCCTGGTCAAGTTCTG<br>F: TAGGAGTAGTGCCCAAATGC       |
| <i>Agk</i>                      | R: GCCGTCTCCTCCAGCAACAATG<br>F: AAGAAGAGCAGCCTGTCAAGAAGC |
| <i><math>\beta</math>-actin</i> | R: GGCATAAACGCAGAGCATTCTG<br>F: CAGTGTCCATCCTCTGAGTAGC   |
| <i>Fas</i>                      | F: CTCATCCACTCAGGTTTCAG<br>R: AGGTATGCTCGCTTCTCT         |
| <i>Scd-1</i>                    | F: TGATGTTCCAGAGGAGGTA<br>R: CCAGAGTGTATCGCAAGAA         |
| <i>Acc</i>                      | F: AGCAGTTACACCACATACAT<br>R: GTCATCACCATCTTCATTACC      |
| <i>Srebp1c</i>                  | F: GCTTCTCTTCTGCTTCTCT<br>R: GCTGTAGGATGGTGAGTG          |
| <i>Ppar-<math>\gamma</math></i> | F: CCGAAGAACCATCCGATT<br>R: CGCAGATCAGCAGACTC            |
| <i>Cd36</i>                     | F: GGTCCTTACACATACAGAGT<br>R: CTACAGCCAGATTCAGAACT       |
| <i>Fabp</i>                     | F: TTCTCAGCCAGCCAGTT<br>R: CATCTCCTCGTAAGCCATT           |
| <i>Ppar-<math>\alpha</math></i> | F: TGCCTTAGAACTGGATGAC<br>R: ATCTGGATGGTTGCTCTG          |
| <i>Cpt1a</i>                    | F: AGCCAGACGAAGAACATC<br>R: CCTTGACCATAGCCATCC           |
| <i>Ucp1</i>                     | F: GAAACACCTGCCTCTCTCGG<br>R: GCATTCTGACCTTCACGACCT      |
| <i>Adrb3</i>                    | F: TAGCCATCAAACCTGTTGAGC<br>R: GGCCCTCTCTAGTTCCCAG       |
| <i>Th</i>                       | F: CTCTCCTCGAATACCACAGCC<br>R: CCAAGGTTTCATTGGACGGC      |
